# Supplementary material
Source: PubMed Central journal article supplement (PMC8717211)
Supplement: jamasurg-e216496-s001.pdf [file jamasurg-e216496-s001.pdf]

## Supplementary Online Content

Aminian A, Tu C, Milinovich A, Wolski KE, Kattan MW, Nissen SE. Association of weight loss achieved through metabolic surgery with risk and severity of COVID-19 infection. *JAMA Surg*. Published online December 29, 2021. doi:10.1001/jamasurg.2021.6496

### **eFigure.** Identification of Eligible Patients for Inclusion

This supplementary material has been provided by the authors to give readers additional information about their work.

**eFigure. Identification of Eligible Patients for Inclusion**

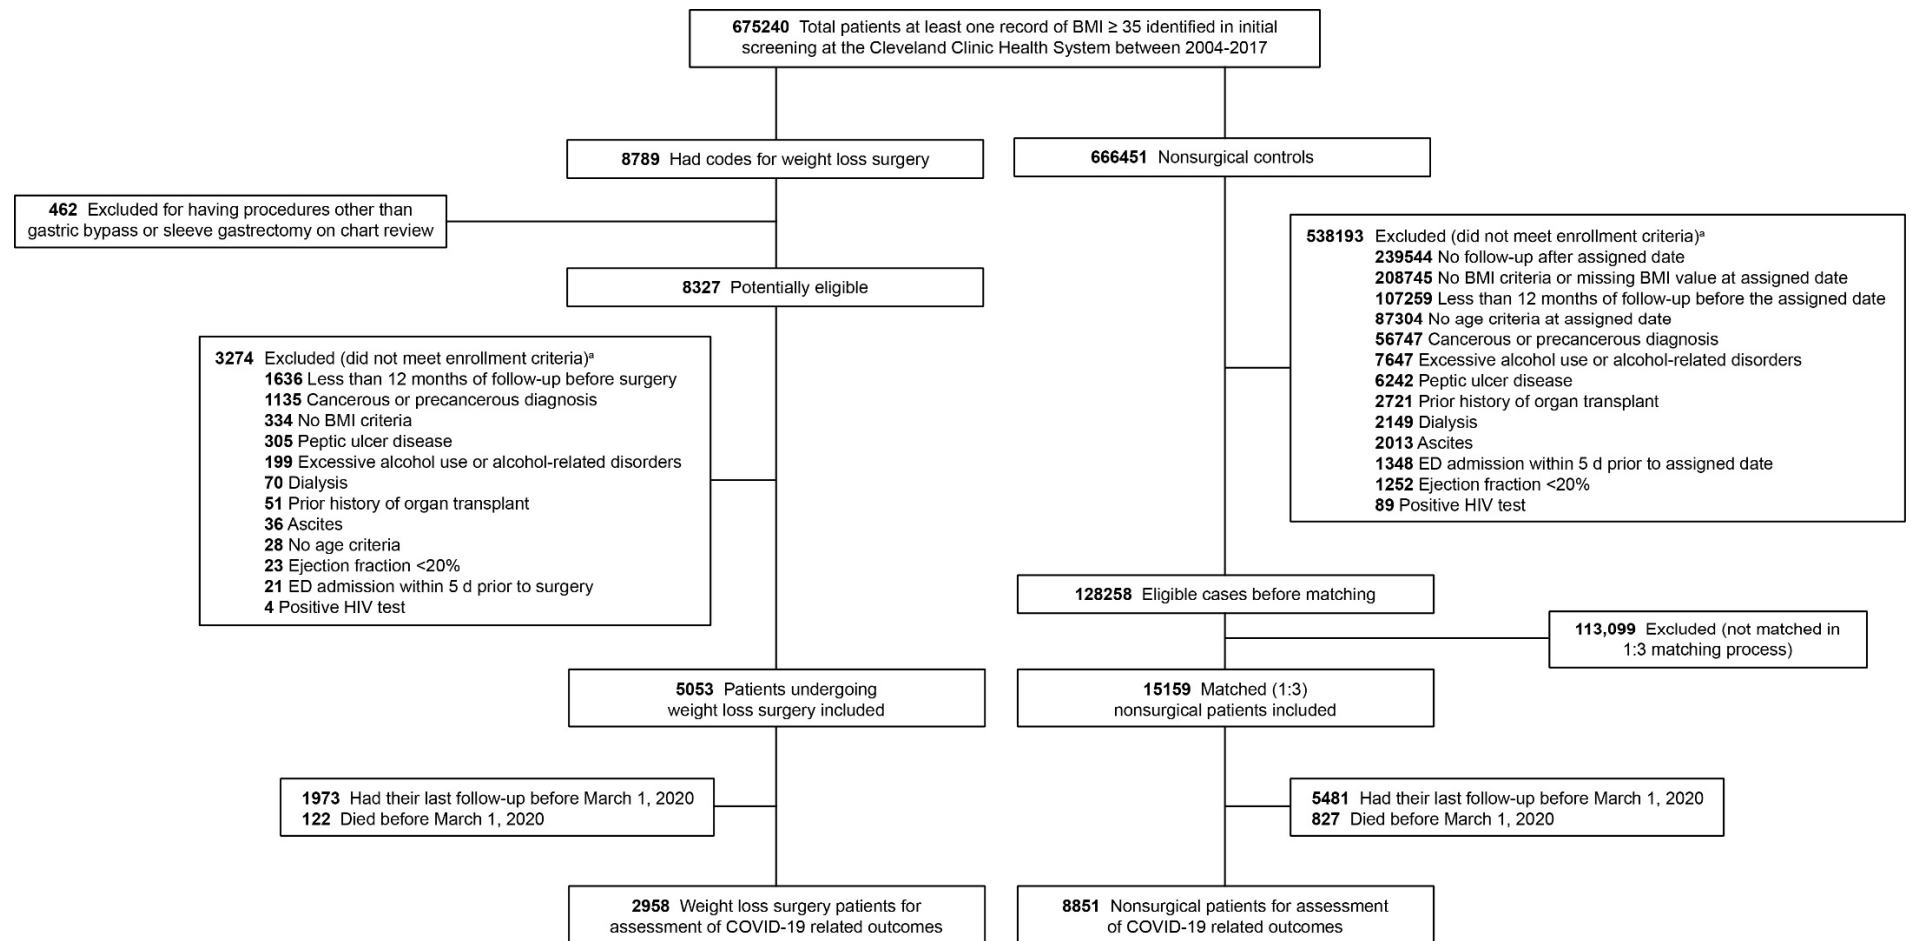

To create a comparable control group, dates of weight loss surgery were randomly assigned to a pool of 666451 patients with BMI  $\geq 35$  kg/m<sup>2</sup>. Non-surgical patients were then removed from the pool if they failed to meet inclusion/exclusion criteria at the assigned point in time, at which point could be seen as potentially eligible for weight loss surgery. Utilizing this algorithm, we identified 128258 comparable non-surgical patients to be considered for matching. With propensity matching of each surgical patient to 3 non-surgical patients, 5053 surgical patients and 15159 matched non-surgical patients were

enrolled into the study. Among them, 2958 surgical patients and 8851 non-surgical patients were available between March 1, 2020 and March 1, 2021 for assessment of COVID-19 related outcomes.

ED, emergency department.

<sup>a</sup> Some patients met multiple exclusion criteria.
